# Supplementary material
Source: PubMed Central journal article supplement (PMC3087474)

**HSC proliferation:** Prospectively sorted HSC (Lineage-CD34<sup>+</sup>CD38<sup>-</sup>CD90<sup>+</sup>CD45RA<sup>-</sup>) were cultured in Stemspan H3000 on hydrogel microwell plates in hydrogels in media containing FL, SCF (FS; 100 ng/ml), Wnt1 (100 ng/ml), Wnt3a (100 ng/ml), Jagged 1 (50 ng/ml), Jagged 2 (50 ng/ml) and DLL4 (50 ng/ml) (collectively “FS/Stem”) in the presence or absence of 40 ng/ml of G-CSF. The plate was then placed in the environmental chamber of an inverted microscope (Zeiss Axiovert 200) equipped with a motorized stage. After cells were randomly distributed and spatially segregated in microwells, the XYZ stage was programmed to repeatedly raster across the microwell array surface, acquiring phase contrast images at 5X magnification of multiple locations in defined time intervals for a period of up to 4 days. The entire surface of the microwell arrays were scanned and the resulting images of the time-lapse experiment were then automatically compiled into a stack (library) using the Volocity software (Improvision). Cells were scored in a blinded fashion and single events were only scored as ‘division’ if there was clear cytokinesis (i.e. one cell became two independently moving cells).



**Table S2, related to Fig. 2. Bimodal signaling responses in HSC and progenitors**

A likelihood ratio test was applied to response profiles to assess the relative probability of unimodality versus bimodality. Mixture modeling was used to estimate the parameters of the bimodal distribution (see Statistical Methods). p-values represent the likelihood of the null hypothesis being true, i.e. of unimodality, with smaller p-value indicating a more bimodal distribution of response. Significant values are bold.

| Sample  | HSC            |                    |                    |                 |                    |                    | CMP                |                | MEP                |                |                    |
|---------|----------------|--------------------|--------------------|-----------------|--------------------|--------------------|--------------------|----------------|--------------------|----------------|--------------------|
|         | No Stim/Stat3  | G-CSF/Stat3        | IL-6/Stat3         | No Stim/Stat5   | Tpo/Stat5          | GM-CSF/Stat5       | IL-3/Stat5         | No Stim/Stat3  | IL-6/Stat3         | No Stim/Stat3  | No Stim/Stat3      |
| CB030   | 0.4526         | <b>&lt;0.00001</b> | ND                 | 0.32704         | <b>&lt;0.00001</b> | <b>&lt;0.00001</b> | ND                 | ND             | ND                 | ND             | ND                 |
| CB031   | 0.931655       | <b>0.008355</b>    | ND                 | 0.16035         | <b>&lt;0.00001</b> | ND                 | ND                 | ND             | ND                 | ND             | ND                 |
| CB033   | 0.12708        | <b>&lt;0.00001</b> | ND                 | 0.220585        | ND                 | ND                 | ND                 | ND             | ND                 | ND             | ND                 |
| CB034   | 0.31455        | <b>0.00298</b>     | <b>&lt;0.00001</b> | 0.98818         | ND                 | <b>0.00011</b>     | ND                 | 0.20358        | <b>&lt;0.00001</b> | 0.32363        | <b>&lt;0.00001</b> |
| CB035   | 0.10429        | <b>&lt;0.00001</b> | ND                 | <b>0.00003</b>  | ND                 | <b>&lt;0.00001</b> | ND                 | ND             | ND                 | ND             | ND                 |
| CB036   | 0.71624        | <b>&lt;0.00001</b> | 0.528375           | 0.74946         | <b>&lt;0.00001</b> | <b>&lt;0.00001</b> | <b>&lt;0.00001</b> | 0.110715       | 0.145945           | 0.12805        | <b>&lt;0.00001</b> |
| CB037   | 0.535365       | <b>0.04229</b>     | <b>&lt;0.00001</b> | 0.626005        | 0.216935           | <b>0.00705</b>     | <b>0.00574</b>     | <b>0.0214</b>  | 0.66739            | 0.41627        | <b>&lt;0.00001</b> |
| MPB1082 | 0.243775       | ND                 | <b>0.00001</b>     | <b>0.01027</b>  | <b>&lt;0.00001</b> | <b>&lt;0.00001</b> | ND                 | 0.1647         | <b>&lt;0.00001</b> | 0.28192        | <b>&lt;0.00001</b> |
| MPB1111 | 0.17814        | <b>&lt;0.00001</b> | <b>&lt;0.00001</b> | <b>0.00013</b>  | <b>&lt;0.00001</b> | <b>&lt;0.00001</b> | ND                 | 0.065185       | <b>&lt;0.00001</b> | 0.119835       | <b>&lt;0.00001</b> |
| MPB1140 | 0.08941        | <b>&lt;0.00001</b> | <b>&lt;0.00001</b> | <b>0.00009</b>  | <b>&lt;0.00001</b> | <b>&lt;0.00001</b> | <b>&lt;0.00001</b> | <b>0.01306</b> | <b>&lt;0.00001</b> | <b>0.02885</b> | <b>&lt;0.00001</b> |
| NM1731  | <b>0.03683</b> | <b>0.00165</b>     | 0.351795           | <b>0.00512</b>  | <b>0.01586</b>     | <b>&lt;0.00001</b> | <b>&lt;0.00001</b> | <b>0.00009</b> | <b>&lt;0.00001</b> | 0.07394        | <b>&lt;0.00001</b> |
| NM1755  | <b>0.00663</b> | <b>0.00005</b>     | <b>&lt;0.00001</b> | <b>0.00002</b>  | <b>0.00064</b>     | <b>&lt;0.00001</b> | <b>&lt;0.00001</b> | 0.19656        | <b>&lt;0.00001</b> | 0.097465       | <b>&lt;0.00001</b> |
| NM1761  | 0.1616         | <b>&lt;0.00001</b> | <b>&lt;0.00001</b> | <b>0.039055</b> | <b>0.00384</b>     | <b>&lt;0.00001</b> | <b>&lt;0.00001</b> | 0.084735       | <b>&lt;0.00001</b> | 0.174425       | <b>&lt;0.00001</b> |

**Table S3, related to Fig. 2. Cytokines synergize on hematopoietic stem cells**  
 Percentage of cells responding, median fluorescent intensity, and 95<sup>th</sup> percentile of fluorescence for HSC from normal marrow (NM), cord blood (CB) and G-CSF mobilized peripheral blood. p-value from a paired t-test comparing the values of each individual stimulus (FL, SCF, Tpo, IL-3, and IL-6) to the combination (FST36).

|          |          | Stat5 (pY694)            |                     |                              |
|----------|----------|--------------------------|---------------------|------------------------------|
|          |          | Percent Cells Responding | Median Fluorescence | 95th Percentile Fluorescence |
| NM1731   | No Stim  | 0                        | 209                 | 389                          |
| NM1731   | FL       | 2.2                      | 246                 | 435                          |
| NM1731   | SCF      | 3.88                     | 342                 | 493                          |
| NM1731   | Tpo      | 73.4                     | 730                 | 1466                         |
| NM1731   | IL-3     | 49.6                     | 505                 | 1423                         |
| NM1731   | IL-6     | 0.64                     | 265                 | 408                          |
| NM1731   | FST36    | 78.8                     | 1114                | 1969                         |
|          | <b>p</b> | <b>0.012194969</b>       | <b>0.000766088</b>  | <b>0.005078043</b>           |
| NM1755   | No Stim  | 0                        | 476                 | 837                          |
| NM1755   | FL       | 2.46                     | 505                 | 855                          |
| NM1755   | SCF      | 0.76                     | 356                 | 736                          |
| NM1755   | Tpo      | 44.5                     | 897                 | 1817                         |
| NM1755   | IL-3     | 33.6                     | 686                 | 1940                         |
| NM1755   | IL-6     | 0.37                     | 346                 | 613                          |
| NM1755   | FST36    | 82                       | 1601                | 2753                         |
|          | <b>p</b> | <b>0.001121316</b>       | <b>0.00028676</b>   | <b>0.002652829</b>           |
| NM1761   | No Stim  | 1.57                     | 247                 | 438                          |
| NM1761   | FL       | 0.29                     | 229                 | 428                          |
| NM1761   | SCF      | 2.66                     | 277                 | 448                          |
| NM1761   | Tpo      | 54.2                     | 597                 | 1010                         |
| NM1761   | IL-3     | 54.7                     | 640                 | 1639                         |
| NM1761   | IL-6     | 2.3                      | 209                 | 413                          |
| NM1761   | FST36    | 87.3                     | 977                 | 2049                         |
|          | <b>p</b> | <b>0.003767215</b>       | <b>0.001681538</b>  | <b>0.003171778</b>           |
| CB036    | No Stim  | 0                        | 282                 | 453                          |
| CB036    | FL       | 0                        | 218                 | 401                          |
| CB036    | SCF      | 2.08                     | 243                 | 546                          |
| CB036    | Tpo      | 25.8                     | 409                 | 927                          |
| CB036    | IL-3     | 22.6                     | 374                 | 1069                         |
| CB036    | IL-6     | 4.69                     | 358                 | 602                          |
| CB036    | FST36    | 80.3                     | 939                 | 1730                         |
|          | <b>p</b> | <b>0.000110359</b>       | <b>4.09079E-05</b>  | <b>0.000602322</b>           |
| CB037    | No Stim  | 0                        | 311                 | 545                          |
| CB037    | FL       | 1.11                     | 212                 | 388                          |
| CB037    | SCF      | 0.4                      | 240                 | 449                          |
| CB037    | Tpo      | 20.3                     | 533                 | 1063                         |
| CB037    | IL-3     | 43.3                     | 703                 | 1460                         |
| CB037    | IL-6     | 1.19                     | 275                 | 526                          |
| CB037    | FST36    | 81.8                     | 1406                | 2363                         |
|          | <b>p</b> | <b>0.00061356</b>        | <b>0.00023134</b>   | <b>0.000803143</b>           |
| GMPB1082 | No Stim  | 0                        | 154                 | 307                          |
| GMPB1082 | FL       | 0                        | 168                 | 300                          |
| GMPB1082 | SCF      | 0.58                     | 160                 | 300                          |
| GMPB1082 | Tpo      | 41.3                     | 381                 | 1011                         |
| GMPB1082 | IL-3     | 4.39                     | 118                 | 391                          |
| GMPB1082 | IL-6     | 0.54                     | 171                 | 319                          |
| GMPB1082 | FST36    | 67.6                     | 600                 | 1545                         |
|          | <b>p</b> | <b>0.000956289</b>       | <b>0.000493373</b>  | <b>0.000712134</b>           |
| GMPB1111 | No Stim  | 0.24                     | 160                 | 341                          |
| GMPB1111 | FL       | 0.26                     | 173                 | 313                          |
| GMPB1111 | SCF      | 0                        | 186                 | 344                          |
| GMPB1111 | Tpo      | 28.7                     | 338                 | 951                          |
| GMPB1111 | IL-3     | 19.7                     | 237                 | 950                          |
| GMPB1111 | IL-6     | 0.81                     | 162                 | 356                          |
| GMPB1111 | FST36    | 61.9                     | 592                 | 1543                         |
|          | <b>p</b> | <b>0.000491403</b>       | <b>0.000162017</b>  | <b>0.00153977</b>            |
| GMPB1140 | No Stim  | 0.52                     | 154                 | 315                          |
| GMPB1140 | FL       | 0.88                     | 104                 | 181                          |
| GMPB1140 | SCF      | 0.66                     | 167                 | 298                          |
| GMPB1140 | Tpo      | 48.8                     | 365                 | 981                          |
| GMPB1140 | IL-3     | 23.7                     | 218                 | 983                          |
| GMPB1140 | IL-6     | 5.67                     | 201                 | 426                          |
| GMPB1140 | FST36    | 75.1                     | 673                 | 1474                         |
|          | <b>p</b> | <b>0.001525387</b>       | <b>0.000215722</b>  | <b>0.003124156</b>           |

  

|  |  | Erk (pT202/pY204)        |                     |                              |
|--|--|--------------------------|---------------------|------------------------------|
|  |  | Percent Cells Responding | Median Fluorescence | 95th Percentile Fluorescence |
|  |  | 1.13                     | 98.7                | 197                          |
|  |  | 2.27                     | 99.9                | 208                          |
|  |  | 6.29                     | 129                 | 285                          |
|  |  | 1.67                     | 113                 | 242                          |
|  |  | 0.54                     | 90.8                | 168                          |
|  |  | 0.6                      | 99.2                | 180                          |
|  |  | 34.4                     | 206                 | 582                          |
|  |  | <b>3.477E-06</b>         | <b>5.8787E-05</b>   | <b>3.40558E-05</b>           |
|  |  | 0.49                     | 124                 | 211                          |
|  |  | 10.9                     | 158                 | 336                          |
|  |  | 15.3                     | 150                 | 397                          |
|  |  | 10.6                     | 129                 | 435                          |
|  |  | 1.38                     | 128                 | 213                          |
|  |  | 2.2                      | 117                 | 213                          |
|  |  | 55.4                     | 279                 | 862                          |
|  |  | <b>3.11492E-05</b>       | <b>2.36716E-05</b>  | <b>0.000147043</b>           |
|  |  | 0                        | 105                 | 184                          |
|  |  | 2.56                     | 106                 | 250                          |
|  |  | ND                       | ND                  | ND                           |
|  |  | 5.54                     | 114                 | 292                          |
|  |  | 0                        | 90.4                | 165                          |
|  |  | 0                        | 86.3                | 152                          |
|  |  | 41.8                     | 240                 | 599                          |
|  |  | <b>3.99536E-05</b>       | <b>0.000108277</b>  | <b>0.000723323</b>           |

**Table S4, related to Fig. 4. Engraftment characteristics of NOD/SCID/IL-2R $\gamma$ <sup>null</sup> (NSG) mice engrafted with CD114<sup>neg/lo</sup> or CD114<sup>pos</sup> subsets from human HSC compartment**

| Sample       | Week 6    |            |           |             | Week 14   |            |           |             |     |
|--------------|-----------|------------|-----------|-------------|-----------|------------|-----------|-------------|-----|
|              | Chimerism | % B Cells  | % Myeloid | Engraftment | Chimerism | % B Cells  | % Myeloid | Engraftment |     |
| CD114 neg/lo | NM 1      | 0.19092066 | 72.6      | 10.2        | Yes       | 2.94573643 | 93.2      | 2.79        | Yes |
|              | NM 1      | 0          | •         | •           | No        | 0.28694405 | 87.3      | 6.46        | Yes |
|              | NM 1      | 0          | •         | •           | No        | 0          | •         | •           | No  |
|              | NM 1      | 0.10162602 | 60.8      | 35.4        | Yes       | 11.4942529 | 94.2      | 1.97        | Yes |
|              | NM 1      | 1.93615908 | 67.2      | 23.4        | Yes       | 12.6153846 | 95.2      | 1.76        | Yes |
|              | NM 2      | 1.13519092 | 89.3      | 2.65        | Yes       | 0.99415804 | 96.1      | 1.97        | Yes |
|              | NM 2      | 1.01340977 | 83.7      | 10.6        | Yes       | 1.45046806 | 91.5      | 4.15        | Yes |
|              | NM 2      | 0          | •         | •           | Yes       | 1.60663656 | 87        | 8.43        | Yes |
|              | NM 2      | 8.92307692 | 85.8      | 8.13        | Yes       | 0.17567428 | 89.9      | 4.93        | Yes |
|              | NM 2      | 0          | •         | •           | No        | 0          | •         | •           | No  |
|              | NM 2      | 0.36154828 | 2.38      | 91.7        | Yes       | 5.19045626 | 95.9      | 2.15        | Yes |
|              | NM 2      | 0.26541445 | 0         | 91.3        | Yes       | 0.155521   | 91        | 7           | Yes |
|              | NM 2      | 0          | •         | •           | No        | 0.28917211 | 90.9      | 3.86        | Yes |
|              | NM 2      | 15.0515464 | 69.3      | 20.4        | Yes       | 62.3443983 | 92.9      | 4.42        | Yes |
| CD114 hi     | NM 1      | 0.31512605 | 87        | 4.11        | Yes       | 0.12317799 | 95.5      | 1.72        | Yes |
|              | NM 1      | 0          | •         | •           | No        | 0          | •         | •           | No  |
|              | NM 1      | 0          | •         | •           | No        | 0          | •         | •           | No  |
|              | NM 1      | 0          | •         | •           | No        | 0.7182087  | 91.2      | 1.03        | Yes |
|              | NM 2      | 0          | •         | •           | No        | 0          | •         | •           | No  |
|              | NM 2      | 0.92237538 | 92.9      | 0.39        | Yes       | 0          | •         | •           | No  |
|              | NM 2      | 0.12497396 | 83.7      | 10.9        | Yes       | 0          | •         | •           | No  |
|              | NM 2      | 0          | •         | •           | No        | 0          | •         | •           | No  |
|              | NM 2      | 0.53431977 | 89.8      | 1.44        | Yes       | 0          | •         | •           | No  |
|              | NM 2      | 0          | •         | •           | No        | 0          | •         | •           | No  |

**Figure s1, related to Fig. 2. Average response profile by cell type**

Heatmap showing the average percent response of each stem and progenitor compartment in all progenitor populations (CB, n=8; GMPB, n=3; BM, n=4) after 15-minute cytokine stimulation. For normal marrow, three nodes (Stat3, Stat5, and Erk) are measured. For MPB and CB, two nodes (Stat3, Stat5) are measured.

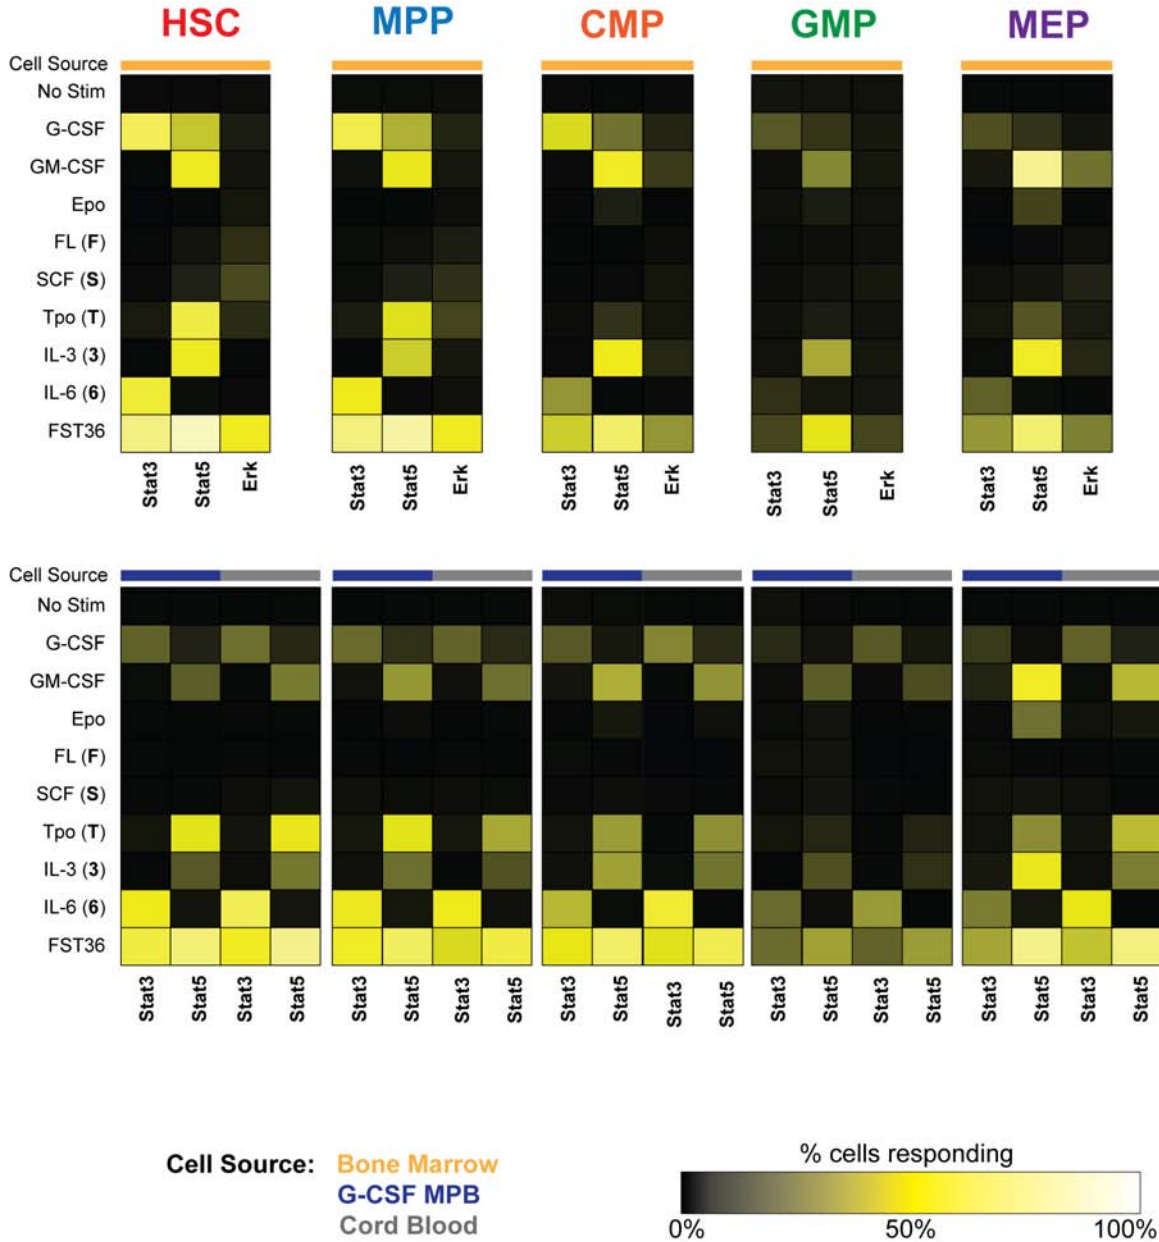

**Figure S2, related to Fig. 2. Complete response profile by phospho-node.** Phospho-specific response is shown for each stimulus and node tested after 15 minutes of stimulation. Each small bar represents a different biological replicate with HSC, MPP, CMP, GMP, and MEP compartments listed from left to right.

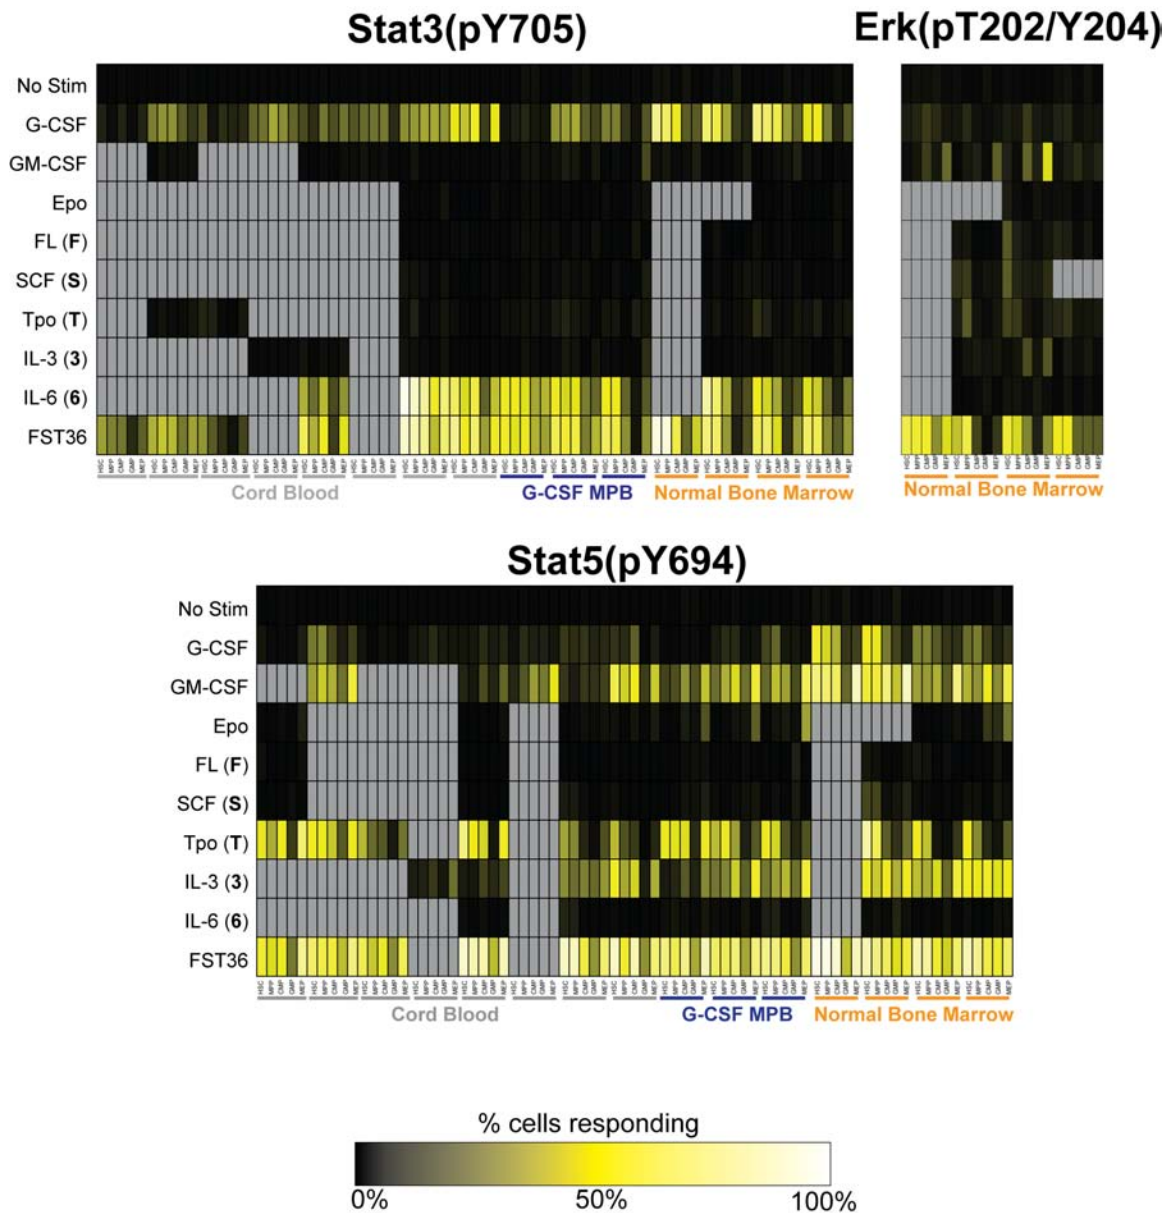

**Figure S3, related to Fig. 2. Comparison of JAK/Stat responses in HSC from cord blood, G-CSF mobilized peripheral blood, and normal bone marrow.** Percentage of HSC from cord blood, G-CSF mobilized peripheral blood, and normal bone marrow responding to (A) G-CSF via Stat3 phosphorylation, (B) G-CSF via Stat5 phosphorylation, (C) IL-3 via Stat5 phosphorylation, (D) GM-CSF via Stat5 phosphorylation, (E) Tpo via Stat5 phosphorylation, and (F) IL-6 via Stat3 phosphorylation. Statistical differences are noted. p-values determined using pairwise comparison of normal bone marrow to cord blood or G-CSF mobilized peripheral blood by one-tailed t-test.



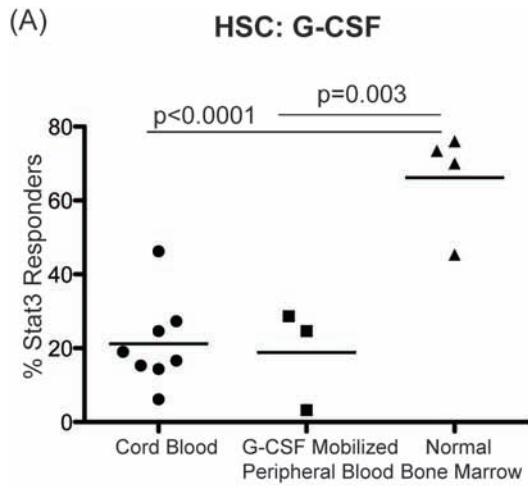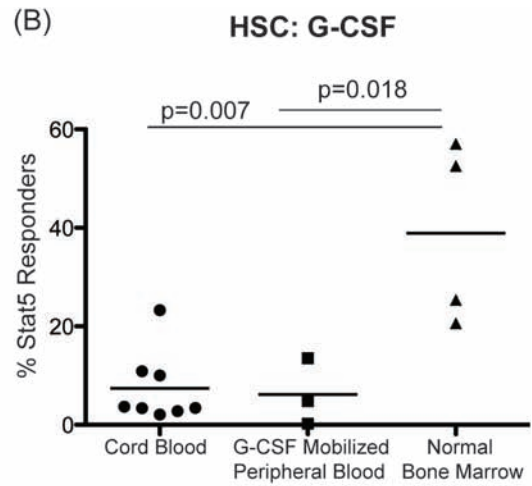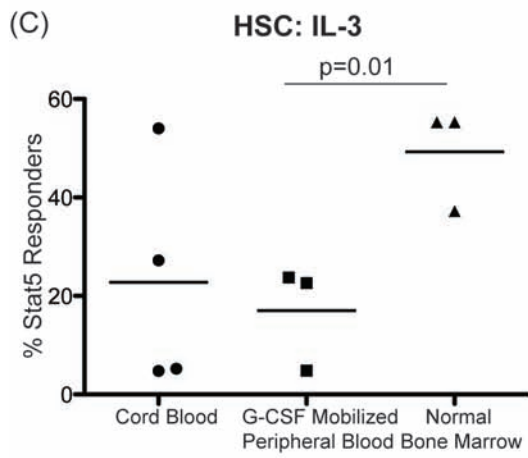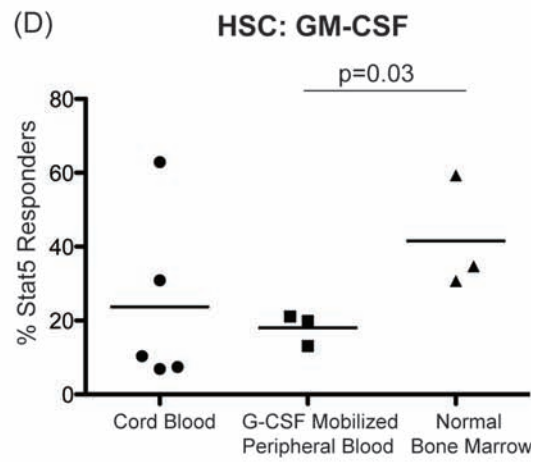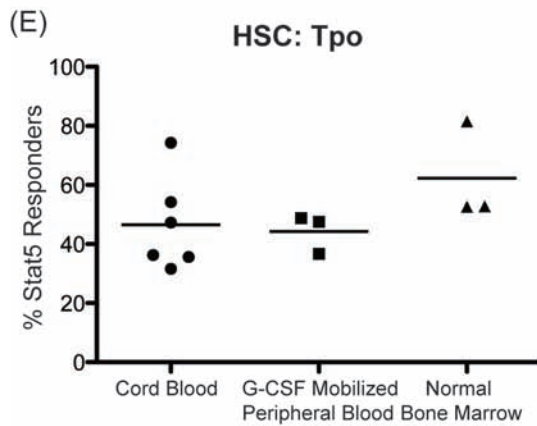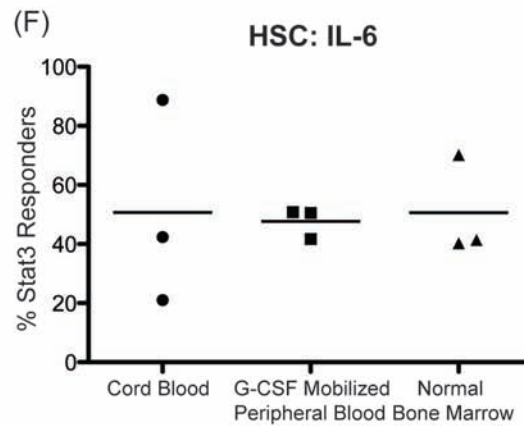

**Figure S4, related to Fig. 2. Comparison of G-CSF response in bone marrow HSC and GMP compartments.** Flow cytometric plot of phosphorylation of Stat3 (pY705) and Stat5 (pY694) in bone marrow (A) HSC or (B) GMP that were (i) unstimulated or (ii) after 15-minute stimulation by G-CSF. Shaded region represents the percentage of responsive cells in each condition. Stat3 (pY705) median fluorescence and 95<sup>th</sup> percentile fluorescence are inset for each condition. Plots are representative of four independent biological replicates.

## (A) HSC

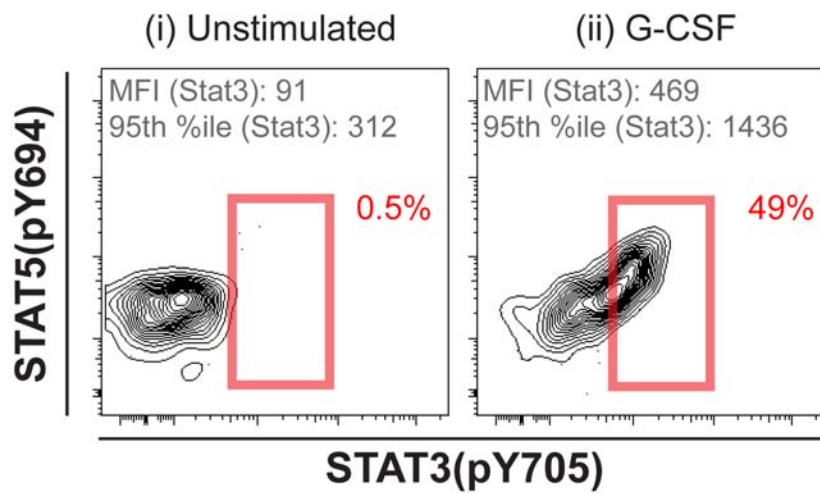

## (B) GMP

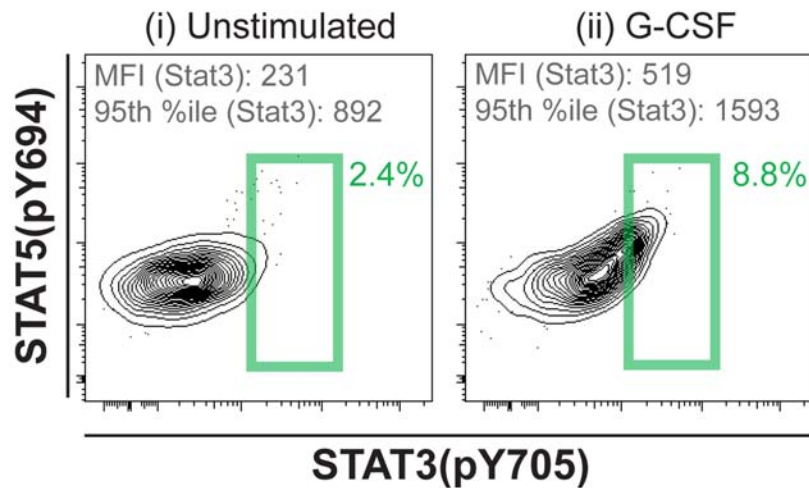

**Figure S5, related to Fig. 2. MEP Respond to Epo directly in adult-derived samples.** Percentage of MEP from cord blood and adult derived samples (G-CSF mobilized peripheral blood and normal bone marrow) responding to Epo after 15 minute stimulation via Stat5 phosphorylation. p-values determined using pairwise comparison and one-tailed t-test.

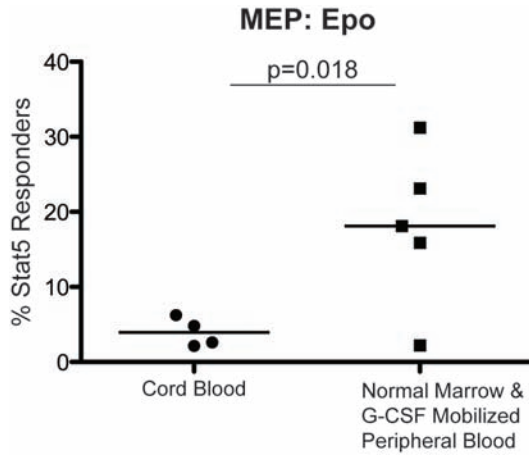

**Figure S6, related to Fig. 3. G-CSF drives cord blood HSC to proliferate in the presence of Wnt & Notch ligands.** Frequency of proliferation ( $\geq$  one cell division) for prospectively sorted, single cord blood HSC plated on hydrogel microwells in serum-free, defined media supplemented with FL, SCF and a cocktail of Wnt and Notch ligands (Wnt1, Wnt3a, Jagged 1, Jagged 2, and DLL4, collectively “FS/Stem”) alone or in combination with 40 ng/ml G-CSF. Differences between proliferation frequency at 80 hours were statistically significant ( $p=0.0012$ , paired, one-tailed t-test).

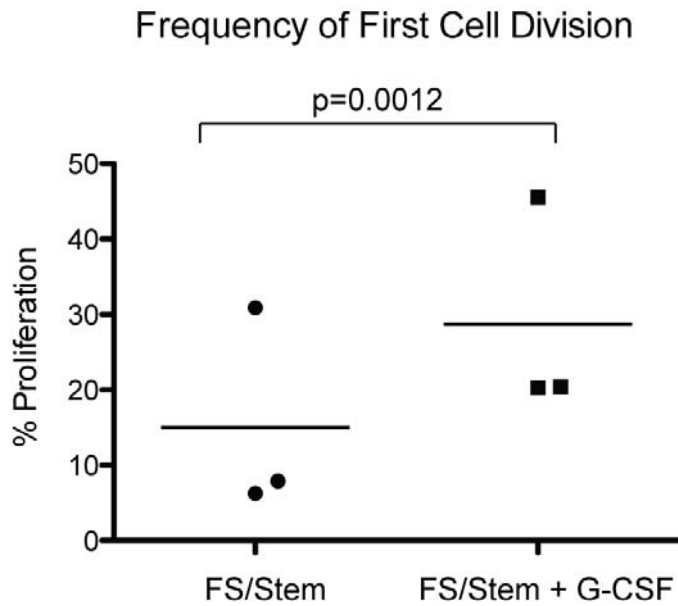

**Figure S7, related to Fig. 4. Efficiency of bone marrow HSC purification based on CD114 expression.** Flow cytometric analysis of human bone marrow HSC compartment stained for CD114 (a) unsorted, (b) post sort for CD114<sup>neg/lo</sup>, and (c) post sort for CD114<sup>pos</sup>. CD114 gates drawn based on staining of isotype control.

**(A) Pre-Sort**

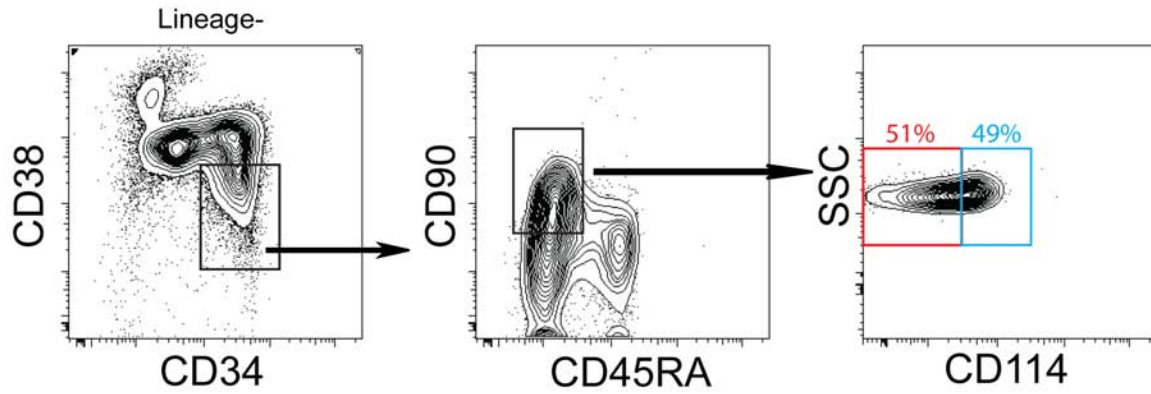

**(B) Post-Sort: CD114 lo**

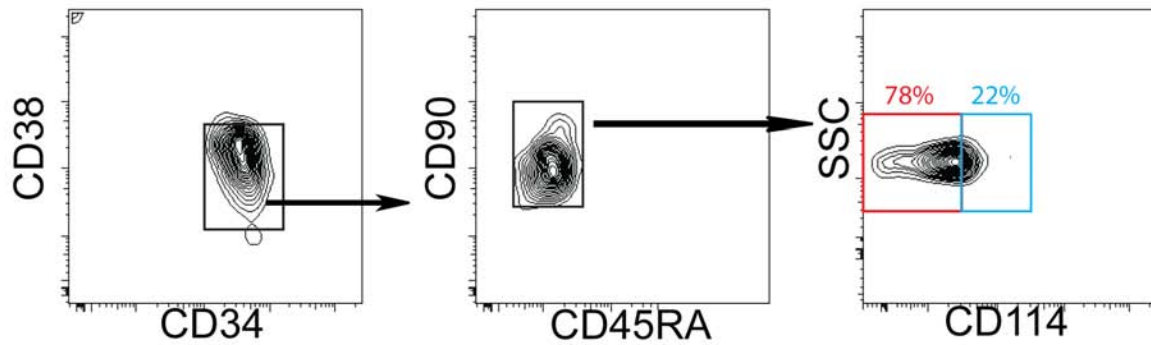

**(C) Post-Sort: CD114 hi**

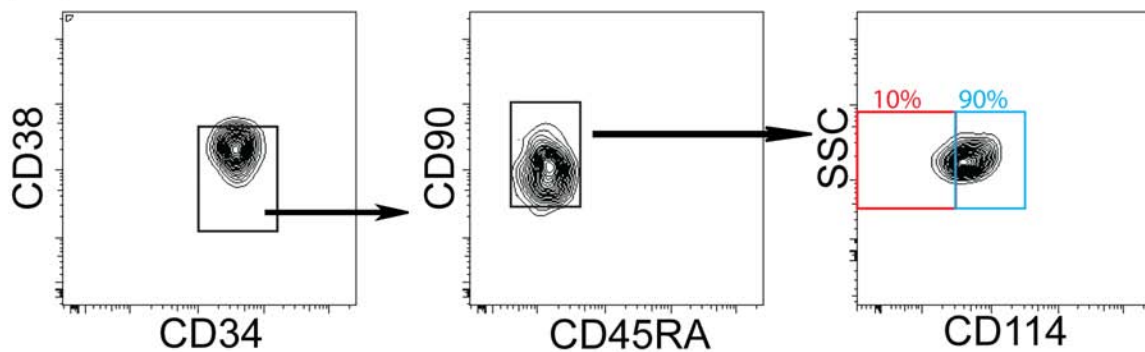

Supplement: supp_blood-2010-07-298232_Document1.pdf [file supp_blood-2010-07-298232_Document1.pdf]
